# Supplementary material for: Systems Modeling of Anti-apoptotic Pathways in Prostate Cancer: Psychological Stress Triggers a Synergism Pattern Switch in Drug Combination Therapy
Source: PubMed Central journal article supplement (PMC3854132; doi:10.1371/journal.pcbi.1003358), 2013-12-05
Supplement: pcbi.1003358.s004.pdf [file pcbi.1003358.s004.pdf]

| Para No. | Symbol        | Value  | Description                                           |
|----------|---------------|--------|-------------------------------------------------------|
| 47       | $d_{apop}$    | 0.3882 | apoptosis rate of prostate cancer cells               |
| 48       | $V_{BADs112}$ | 0.9961 | Hill regulatory factor of apoptosis by S112BAD        |
| 49       | $K_{BADs112}$ | 0.8235 | Michealis constant in apoptosis regulation by S112BAD |
| 50       | $V_{BADs136}$ | 0.9765 | Hill regulatory factor of apoptosis by S136BAD        |
| 51       | $K_{BADs136}$ | 0.9922 | Michealis constant in apoptosis regulation by S136BAD |
| 52       | $V_{CREB}$    | 0.1373 | Hill regulatory factor of apoptosis by CREB           |
| 53       | $K_{CREB}$    | 0.3608 | Michealis constant in apoptosis regulation by CREB    |
| 54       | $n$           | 5      | Hill exponent of apoptosis regulation by BAD or CREB  |
