# Supplementary material for: Systems Modeling of Anti-apoptotic Pathways in Prostate Cancer: Psychological Stress Triggers a Synergism Pattern Switch in Drug Combination Therapy
Source: PLoS Comput Biol. 2013 Dec 5;9(12):e1003358. doi: 10.1371/journal.pcbi.1003358 (PMC3854132; doi:10.1371/journal.pcbi.1003358)
Supplement: Table S1 — Estimated parameters involved in the signaling pathway. (PDF) [file pcbi.1003358.s003.pdf]

| Para No. | Symbol    | Value  | Description                                             |
|----------|-----------|--------|---------------------------------------------------------|
| 1        | $V_1$     | 4.9412 | maximal activation velocities of EGFR by EGF            |
| 2        | $K_1$     | 1.0784 | Michaelis activation coefficient of EGFR by EGF         |
| 3        | $V_2$     | 3.7255 | maximal activation velocities of Ras by EGFR            |
| 4        | $K_2$     | 0.0588 | Michaelis activation coefficient of Ras by EGFR         |
| 5        | $V_3$     | 3.0588 | maximal activation velocities of ERK by Ras             |
| 6        | $K_3$     | 0.2549 | Michaelis activation coefficient of ERK by Ras          |
| 7        | $V_4$     | 2.2549 | maximal activation velocities of KinaseX by ERK         |
| 8        | $K_4$     | 1.4314 | Michaelis activation coefficient of KinaseX by ERK      |
| 9        | $V_5$     | 4.5294 | maximal activation velocities of Rac by EGFR            |
| 10       | $K_5$     | 0.2549 | Michaelis activation coefficient of Rac by EGFR         |
| 11       | $V_6$     | 4.9020 | maximal activation velocities of PAK by Rac             |
| 12       | $K_6$     | 1.0392 | Michaelis activation coefficient of PAK by Rac          |
| 13       | $K_7$     | 0.0392 | Michaelis inhibition coefficient of PI3K by LY          |
| 14       | $V_8$     | 4.3333 | maximal activation velocities of AKT by PI3K            |
| 15       | $K_8$     | 1.6667 | Michaelis activation coefficient of AKT by PI3K         |
| 16       | $V_9$     | 2.9020 | maximal activation velocities of cAMP by epinephrine    |
| 17       | $K_9$     | 4.8824 | Michaelis activation coefficient of cAMP by epinephrine |
| 18       | $V_{10}$  | 3.2745 | maximal activation velocities of PKA by cAMP            |
| 19       | $K_{10}$  | 4.1373 | Michaelis activation coefficient of PKA by cAMP         |
| 20       | $V_{11}$  | 3.8235 | maximal activation velocities of CREB by PKA            |
| 21       | $K_{11}$  | 0.0196 | Michaelis activation coefficient of CREB by PKA         |
| 22       | $V_{12a}$ | 4.4314 | maximal activation velocities of S112BAD by PKA         |
| 23       | $K_{12a}$ | 1.8431 | Michaelis activation coefficient of S112BAD by PKA      |
| 24       | $V_{12b}$ | 4.9216 | maximal activation velocities of S112BAD by KinaseX     |
| 25       | $K_{12b}$ | 2.0000 | Michaelis activation coefficient of S112BAD by KinaseX  |
| 26       | $V_{12c}$ | 0.8039 | maximal activation velocities of S112BAD by PI3K        |
| 27       | $K_{12c}$ | 0.1569 | Michaelis activation coefficient of S112BAD by PI3K     |
| 28       | $V_{12d}$ | 1.4118 | maximal activation velocities of S112BAD by AKT         |
| 29       | $K_{12d}$ | 4.5098 | Michaelis activation coefficient of S112BAD by AKT      |
| 30       | $V_{13a}$ | 2.7255 | maximal activation velocities of S136BAD by PAK         |
| 31       | $K_{13a}$ | 2.1765 | Michaelis activation coefficient of S136BAD by PAK      |
| 32       | $V_{13b}$ | 3.6863 | maximal activation velocities of S136BAD by AKT         |
| 33       | $K_{13b}$ | 3.0392 | Michaelis activation coefficient of S136BAD by AKT      |
| 34       | $d_1$     | 0.4510 | Dephosphorylation rate of EGFR                          |

|    |          |        |                                   |
|----|----------|--------|-----------------------------------|
| 35 | $d_2$    | 1.1176 | Dephosphorylation rate of Ras     |
| 36 | $d_3$    | 0.7059 | Dephosphorylation rate of ERK     |
| 37 | $d_4$    | 0.4510 | Dephosphorylation rate of KinaseX |
| 38 | $d_5$    | 3.6094 | Dephosphorylation rate of Rac     |
| 39 | $d_6$    | 2.4038 | Dephosphorylation rate of PAK     |
| 40 | $d_7$    | 1.0000 | Dephosphorylation rate of PI3K    |
| 41 | $d_8$    | 1.6250 | Dephosphorylation rate of AKT     |
| 42 | $d_9$    | 0.4933 | Dephosphorylation rate of cAMP    |
| 43 | $d_{10}$ | 0.6374 | Dephosphorylation rate of PKA     |
| 44 | $d_{11}$ | 3.7500 | Dephosphorylation rate of CREB    |
| 45 | $d_{12}$ | 1.9023 | Dephosphorylation rate of S112BAD |
| 46 | $d_{13}$ | 0.9126 | Dephosphorylation rate of S136BAD |
